# Supplementary material for: Ethylene Activates the EIN2-EIN3/EIL1 Signaling Pathway in Tapetum and Disturbs Anther Development in Arabidopsis
Source: MDPI journal article supplement (doi:10.3390/cells11193177), 2022-10-10
Supplement: s1 [file s1]

## Supplementary materials

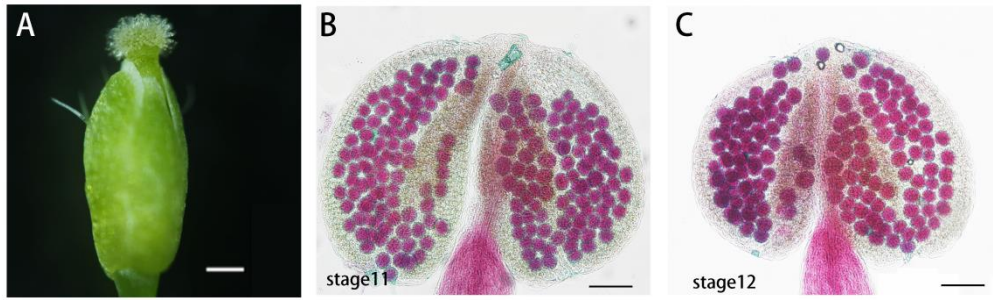

**Figure S1. The closed flower and Alexander staining of anthers after ethylene treatment.** (A) Flower was closed after ethylene treatment for 24 h. Bar = 1.0 mm. (B-C) After 12 h of ethylene treatment, Alexander staining of anther at stage 11 (B) and stage 12 (C). Note that the anthers are full of viable pollens. Bar = 50  $\mu$ m in B and C.

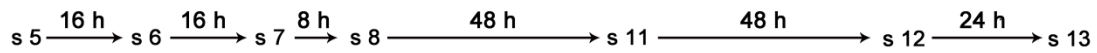

**Figure S2. The time course of anther development.** These data were extracted from a published paper [28].

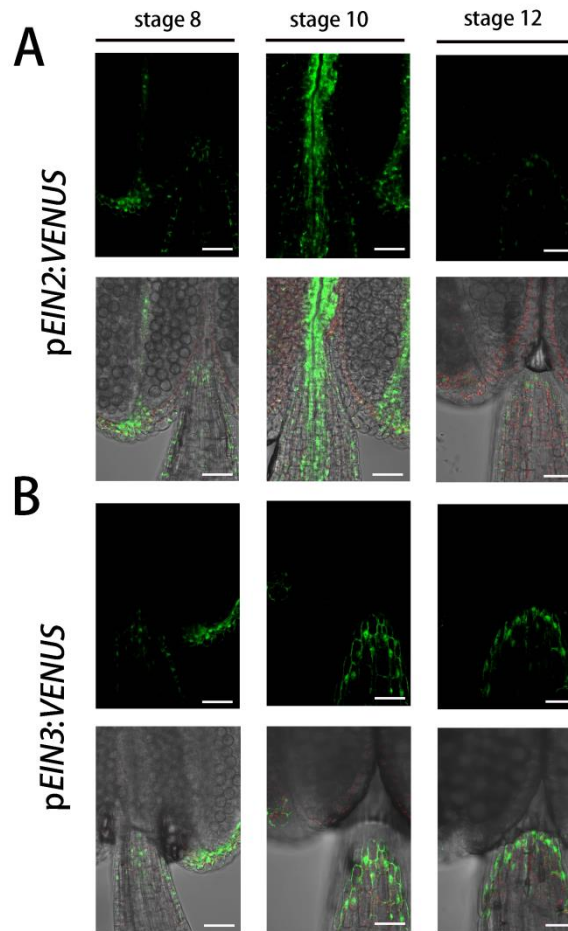

**Figure S3. *EIN2* and *EIN3* are transcribed in filaments.** (A-B) The filaments expression of *pEIN2:VENUS* (A) and *pEIN3:VENUS* (B) reporters during stamen development. Bars = 30  $\mu$ m.

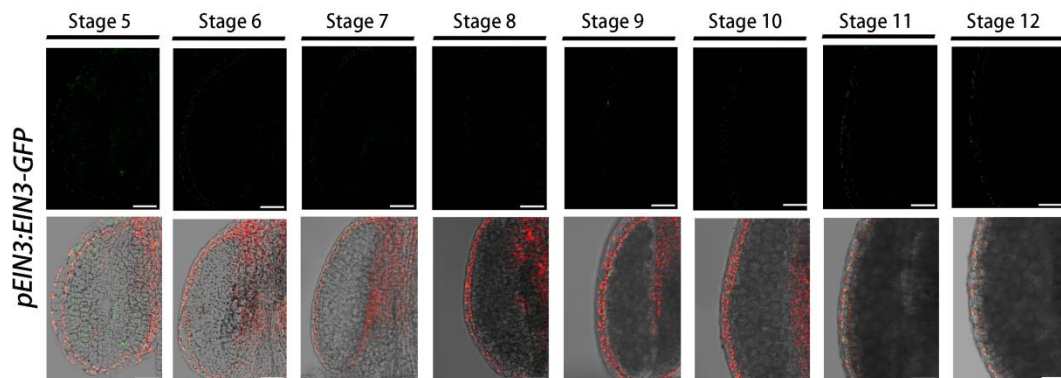

**Figure S4. Expression pattern of *EIN3* in anthers.** The green channel showed the GFP signal and the red fluorescence channel showed auto-fluorescence of chlorophyll. Bars=30 $\mu$ m.

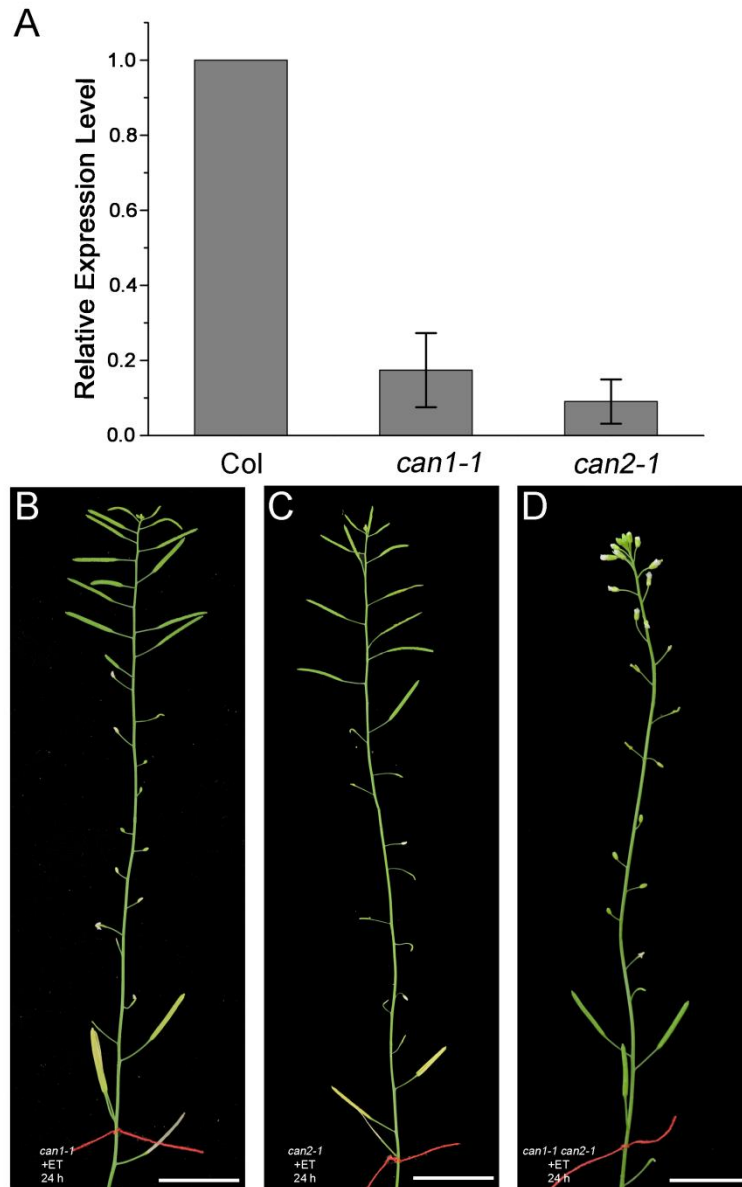

**Figure S5. The fertility of the *can* mutants is disturbed after exogenously ethylene treatment.** (A) Real-time quantitative RT-PCR analysis of the transcript levels of *CaN1* and *CaN2* in *can1-1* and *can2-1*, respectively. (B-D) The inflorescence of *can1-1* (B), *can2-1* (C) and *can1-1 can2-1* (D) after treated with ethylene ( $100 \mu\text{L L}^{-1}$ ) for 24h. After ethylene treatment, these plants grew for 10-14 days under normal condition. Note for the closed buds or short siliques without seeds, indicating these *can* mutants all showed ethylene-sensitive phenotype.

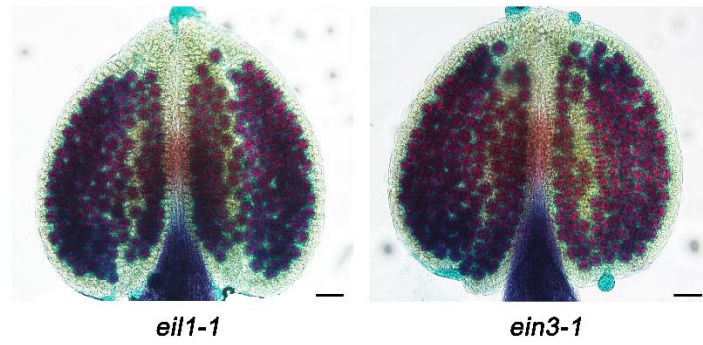

**Figure S6. Alexander staining of pollens of *eil1-1* and *ein3-1*.** Note that the anthers are full of viable pollens. Bars = 50  $\mu$ m.

**Table S1. Primers used in the study.**

| Primer name             | Sequence (5'-3')                                  | Function              |
|-------------------------|---------------------------------------------------|-----------------------|
| <i>ein2-1</i>           | CCAGAGGAAAGAGAGTTGGATGTAAAGTACTCTACCGCT           |                       |
| <i>ein2-1</i>           | CGCCATCTTTGTTTCAACAATCAGATCC                      |                       |
| <i>ein3-1-F</i>         | TACCAAGTATCAAGCGGAG                               |                       |
| <i>ein3-1-R</i>         | AGGCCACCAATCCTCTTTC                               |                       |
| <i>eil1-1-F</i>         | GGGAATGGTGGAAGATAAG                               |                       |
| <i>eil1-1-R</i>         | CTTTCGCCGTCATCTTATCC                              |                       |
| <i>can2-1-LP</i>        | GGTTGATGTGATCGAAAGAATC                            | Mutant identification |
| <i>can2-1-RP</i>        | GGGCTCTTAAAGATTGTTGGG                             |                       |
| LBa1                    | TGGTTCACGTAGTGGGCCATCG                            |                       |
| <i>ers1-2-F</i>         | GTGCCGTCTCGGGATAACAACTTTCTAT                      |                       |
| <i>ers1-2-R</i>         | TCGAGCATGTACTGCCATCTCAGCCTCTT                     |                       |
| <i>etr1-7-F</i>         | GCAATTGTATTGAACCGCA                               |                       |
| <i>etr1-7-R</i>         | CAACCTAGCCACAGGAGAA                               |                       |
| <i>can1-1-LP</i>        | TCCCACTGAATTCAAAACACC                             |                       |
| <i>can1-1-RP</i>        | GAAGCCTCCAGGCTTGTTATC                             |                       |
| LB1.3                   | ATTTTGCCGATTTCGGAAC                               |                       |
| p <i>EIN2</i> -Venus-F  | gaattcgagctcggtacccgggatccAGTTTTTGATTTCTCTTTTATT  | <i>EIN2</i> promoter  |
| p <i>EIN2</i> -Venus -R | gcccttgctcaccattctagaCCTAAATCTATCTGATAATATAATT    |                       |
| p <i>EIN3</i> -Venus -F | gaattcgagctcggtacccgggatccCAACCCTGAAAAAAGATAACC   | <i>EIN3</i> promoter  |
| p <i>EIN3</i> -Venus -R | gcccttgctcaccattctagaTGTAACCTGTAACAAATCAAATACAC   |                       |
| p <i>DYT1</i> -F        | gagctcGACCTTGAAGAAGAAGTGACCG                      | <i>DYT1</i> promoter  |
| p <i>DYT1</i> -R        | ggtaccTTATTTCTTCTTCTTTGATAATTTTTCAGA              |                       |
| p <i>DYT1-EIN2</i> -F   | ttatcaaagaagaagaataacggATCTCTCTCTTTCGATGGAAGTGA   | <i>EIN2</i> gene      |
| p <i>DYT1-EIN2</i> -R   | acgctgcaggtcgactctagaggatccCTAGCGTCGATGTGTCAGCTAC |                       |
| p <i>DYT1-EIN3</i> -F   | ttatcaaagaagaagaataacggAGTATATATACTATGATCTATCTTCC | <i>EIN3</i> gene      |
| p <i>DYT1-EIN3</i> -R   | acgctgcaggtcgactctagaggatccAAGAGAGCTTGCAAATATAT   |                       |
| qRT- <i>TUB</i> -F      | GATTTCAAAGATTAGGGAAGAGTA                          | qRT-PCR               |
| qRT- <i>TUB</i> -R      | GTTCTGAAGCAAATGTCATAGAG                           |                       |
| qRT- <i>CAN1</i> -F     | CAGAATGAGGAAGTGCTTGCT                             |                       |
| qRT- <i>CAN1</i> -R     | CTACACATCTTCCATAACGATCC                           |                       |
| qRT- <i>CAN2</i> -F     | GCTTGGCATTACTTAGCTTATG                            |                       |
| qRT- <i>CAN2</i> -R     | GCCTATTATTCTTTCTCCAGTCC                           |                       |
| qRT- <i>EIN2</i> -F     | TGCAGCAGCTAATGTGTTTCA                             |                       |
| qRT- <i>EIN2</i> -R     | GCGGGTATTTCTATCTTCAGGA                            |                       |
| qRT- <i>EIN3</i> -F     | TCAAGGCTTTGTTTATGGGAT                             |                       |
| qRT- <i>EIN3</i> -R     | GCAAGGTATGAGGAGTCGGT                              |                       |
| qRT- <i>AMS</i> -F      | GATGGACGATTCTGTAACG                               |                       |
| qRT- <i>AMS</i> -R      | AGGCAAGAAATTGAGTCG                                |                       |
| qRT- <i>DYT1</i> -F     | ATTGTGTAAGATTGGGGAG                               |                       |
| qRT- <i>DYT1</i> -R     | AACAGAGGCACTAATAAGAAT                             |                       |
| qRT- <i>TDF1</i> -F     | CAGCTACTAGCGACCTCAC                               |                       |
| qRT- <i>TDF1</i> -R     | GACAACATCTCTTGGTCTTTA                             |                       |

|                       |                         |
|-----------------------|-------------------------|
| qRT- <i>MS188</i> -F  | GAAGAAGAAGTTGTCAGGAA    |
| qRT- <i>MS188</i> -R  | GTGAGCAAGTGAAGCATCT     |
| qRT- <i>MS1</i> -F    | ACTTAACCGGTCATCAGGTCATG |
| qRT- <i>MS1</i> -R    | CGATATCCATCGGTATTCGACTC |
| qRT- <i>ERF109</i> -F | TGTTTGGCTTGGTACTTTCG    |
| qRT- <i>ERF109</i> -R | GCACTTGCCTTTGCTCCTAT    |
| qRT- <i>SAG2</i> -F   | CAGATCTTAGGTCAATCTCGTC  |
| qRT- <i>SAG2</i> -R   | TGGTGGATCTGATCAAATCAAG  |
| qRT- <i>SAG20</i> -F  | TCCTTCGAATTCGTACCTCT    |
| qRT- <i>SAG20</i> -R  | AGTACTCCCTCACCTGTGTG    |
| qRT- <i>ERF1</i> -F   | CAGTCCACGCAACAAACCTA    |
| qRT- <i>ERF1</i> -R   | CCGAGCCAAACCCTAATACC    |
| qRT- <i>ERF7</i> -F   | TCTCACCTACCTCCACAATC    |
| qRT- <i>ERF7</i> -R   | CGGTCTCGGTCCGCTACAAG    |

---

**Table S2. The transcripts of *ERFs* and *SAGs* were detected in the tapetum.**

| Name   | ID          | stage 6 and 7 | stage 8 - 10 |
|--------|-------------|---------------|--------------|
| SAG20  | AT3G10985.1 | 71            | 83           |
| SAG2   | AT5G60360.1 | 19            | 23           |
| ERF109 | AT4G34410.1 | 116           | 77           |
| ERF7   | AT3G20310.1 | 71            | 64           |
| ERF3   | AT1G50640.1 | 38            | 39           |

The data shows the detailed reads number extracted from the transcriptome of tapetal cells (at stage 6-7 and stages 8-10) captured by laser microdissection and pressure catapulting (LMPC) [39].
